# Supplementary material for: ERK2 and JNK1 contribute to TNF-α-induced IL-8 expression in synovial fibroblasts
Source: PubMed Central journal article supplement (PMC5555573; doi:10.1371/journal.pone.0182923), 2017-08-14
Supplement: pone.0182923.s001.pdf [file pone.0182923.s001.pdf]

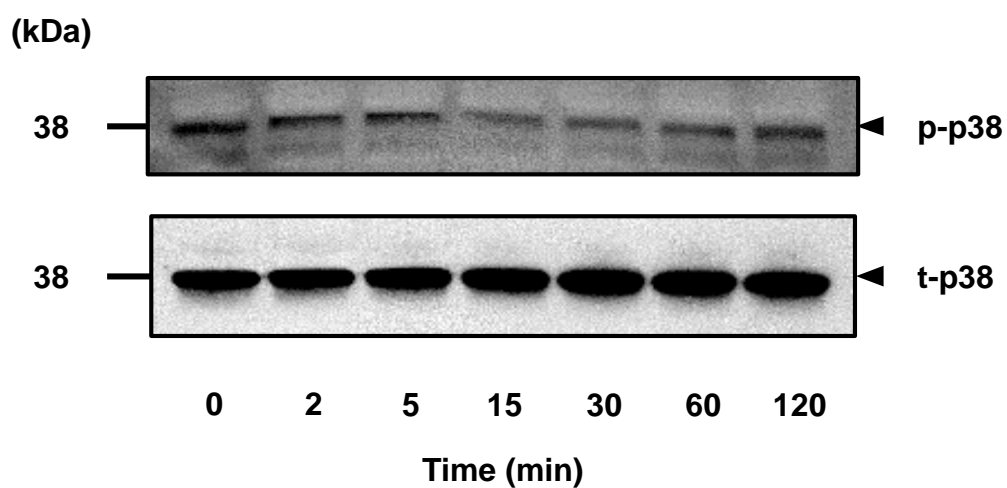

S1 Fig.

No effect of TNF- $\alpha$  on p38 phosphorylation. The levels of phosphorylated p38 (p-p38) and total p38 (t-p38) were detected by western blotting in synovial fibroblasts treated with 50 ng/mL TNF- $\alpha$  for 0-120 min. TNF- $\alpha$  failed to activate p38. Results are representative in three independent experiments. Synovial fibroblasts isolated from three male beagle dogs were used, and each experiment was performed with cells derived from a single donor.
